# Supplementary material for: The guinea pig serves as an alternative model to study human preimplantation development
Source: Springer Nature journal article supplement (doi:10.1038/s41556-025-01642-9), 2025-04-01

# The guinea pig serves as an alternative model to study human preimplantation development

---

In the format provided by the  
authors and unedited

---

1    **SUPPLEMENTARY INFORMATION**

2    **This file contains Supplementary Figs. 1-11**

3    **Supplementary Fig. 1: IGV snapshot displaying the read distribution from middle and late**  
4    **blastocyst EPI, PE, and TE cells for *SOX2*, *NANOG*, *SOX17*, *BMP2*, *CDX2*, and *GATA3*.**

5    **Supplementary Fig. 2: Variance and resolution selection in the guinea pig scRNA-seq dataset.**

6    **Supplementary Fig. 3: Pluripotency signatures in guinea pig and human preimplantation embryos.**

7    **Supplementary Fig. 4: Signalling pathways related to lineage segregation in guinea pig, human,**  
8    **and mouse**

9    **Supplementary Fig. 5: Dose-response of LATs inhibitor in mouse embryos.**

10    **Supplementary Fig. 6: Hippo and MEK-ERK signalling pathways in mouse embryos.**

11    **Supplementary Fig. 7: Dose-response of PKC inhibitor treatment in guinea pig and mouse**  
12    **embryos.**

13    **Supplementary Fig. 8: Dose-response of PI3K-AKT inhibitor in guinea pig and mouse embryos.**

14    **Supplementary Fig. 9: Expression of mural and polar DEGs in guinea pig and human mural and**  
15    **polar cells.**

16    **Supplementary Fig. 10: Heatmap depicting the pseudo-bulk expression of selected genes,**  
17    **categorized by stages and lineages, across human, marmoset, cynomolgus monkey, guinea pig, and**  
18    **mouse species.**

19    **Supplementary Fig. 11: Guinea Pig Blastocysts Sex Validation.**

20

21    **Source Data for Supplementary Figs. 5-8 and 11**

22

23

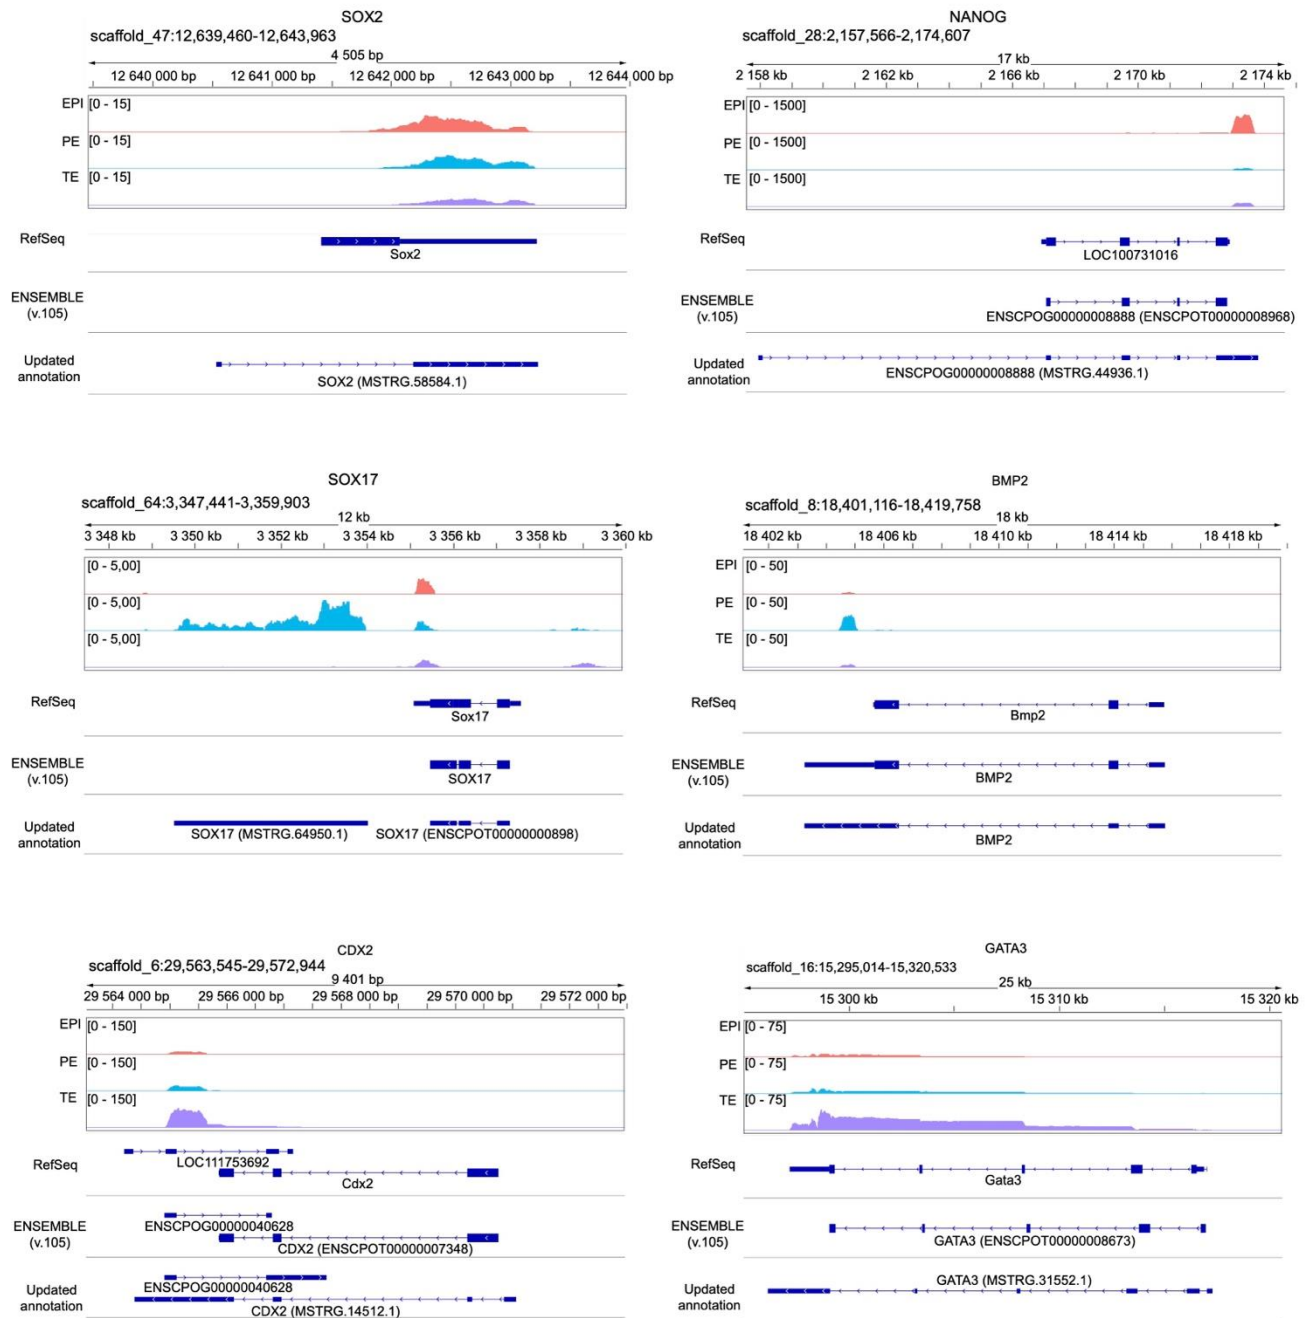

**Supplementary Fig. 1 IGV snapshot displaying the read distribution from middle and late blastocyst EPI, PE, and TE cells for *SOX2*, *NANOG*, *SOX17*, *BMP2*, *CDX2*, and *GATA3*. Gene annotations from RefSeq, ENSEMBL, and updated annotations are listed.**

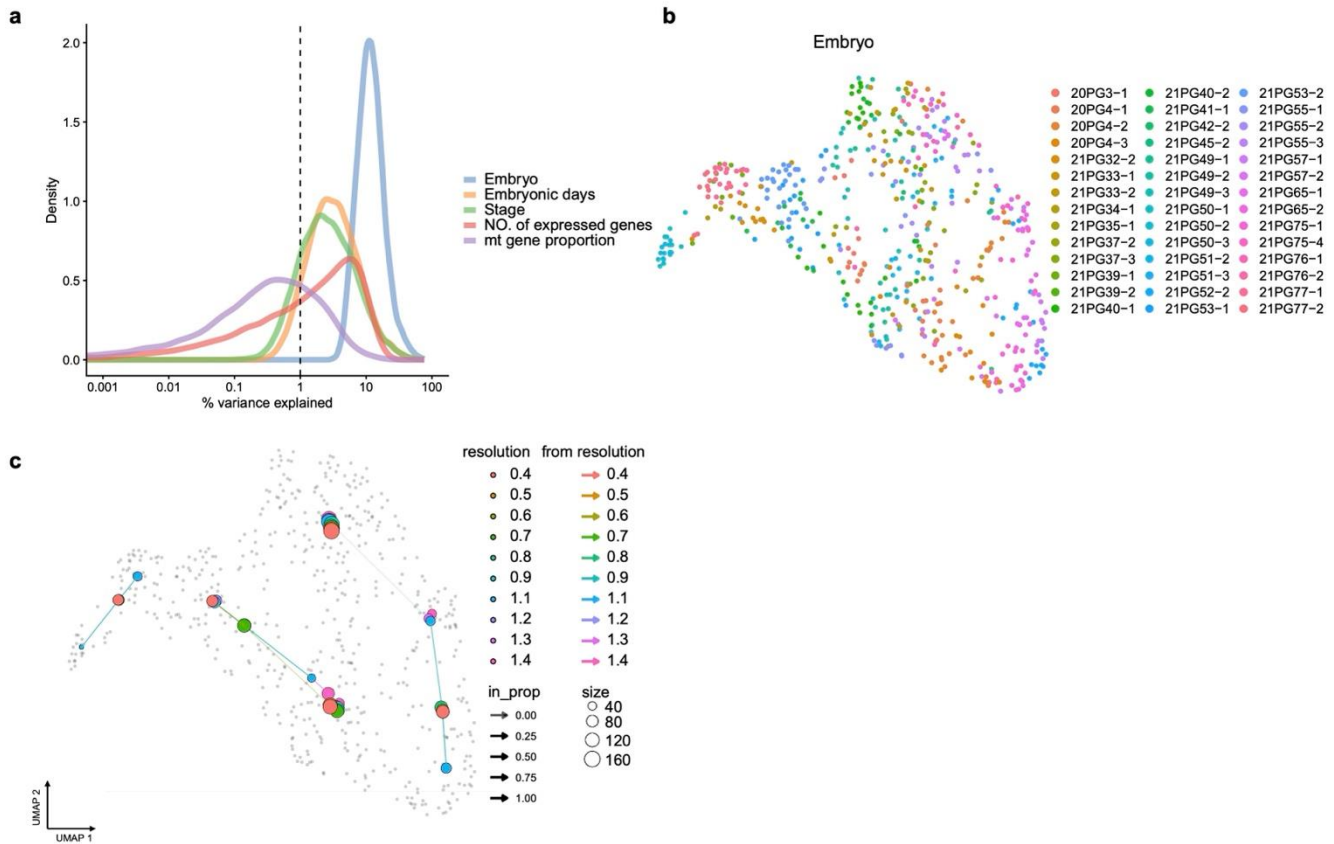

**Supplementary Fig. 2 Variance and resolution selection in the guinea pig scRNA-seq dataset.** **a**, Line plot showing the percentage of variance explained by factors "Embryo", "Embryonic days", "Stages", "Number of expressed genes", and "Mitochondrial gene proportion". **b**, Two-dimensional UMAP representation of 541 single-cell transcriptomes (from 42 embryos) from guinea pig preimplantation embryos, with colours indicating the embryo source. **c**, Cluster stability was analyzed with Clustree at various resolution values (0.4 to 1.4).



38 **Supplementary Fig. 3 Pluripotency signatures in guinea pig and human preimplantation embryos.** Violin plots showing  
39 the expression of selected pluripotency (naive, core and primed) genes in guinea pigs and humans, stratified by lineages.  
40 Published data for the human embryo was leveraged from Petropoulos et al., 2016. Cell numbers used to generate the violin  
41 plots are indicated for each lineage and species.  
42



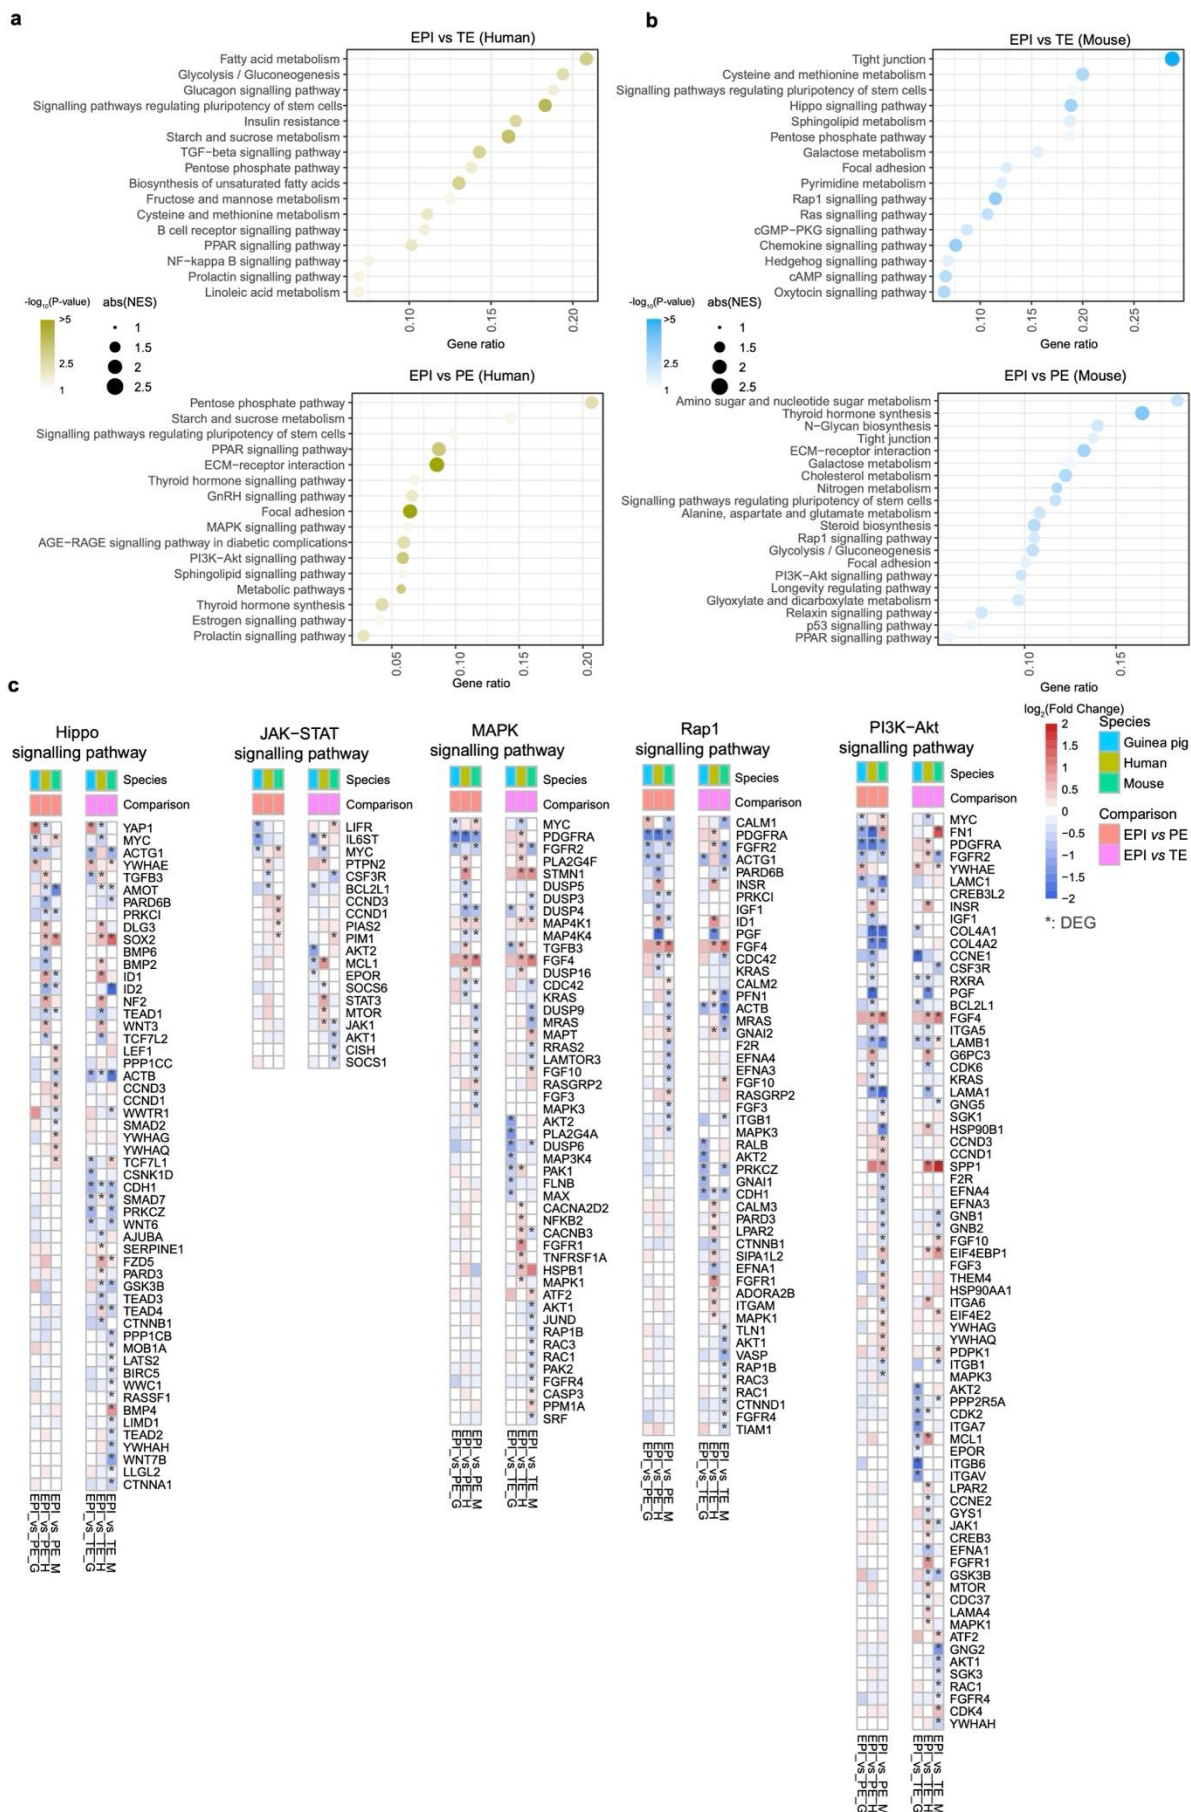

**Supplementary Fig. 4 Signalling pathways related to lineage segregation in guinea pig, human, and mouse. a and b,** Dot plots of KEGG terms showing the results from Gene Set Enrichment Analysis (GSEA) for the EPI-TE comparison and EPI-PE comparison in human (a) and mouse (b), with P values (one-sided, permutation test) less than 0.05 indicated. The dot size indicates the absolute values of normalized enrichment score (NES), colour represents the P value, and the x-axis shows the ratio of DEGs corresponding to each KEGG term. **c,** Gene regulation associated with the Hippo signalling pathway, JAK-STAT signalling pathway, MAPK signalling pathway, Rap1 signalling pathway, and PI3K-AKT signalling pathway in guinea pigs, humans, and mice. The log<sub>2</sub>(fold change) of genes from the EPI-TE and EPI-PE comparisons is represented by colour, with DEGs identified by Bonferroni adjusted P values (two-sided, Wilcoxon test) less than 0.05 and log<sub>2</sub>(fold change) more than 0.25 marked by an asterisk (\*). Species and lineage comparisons are indicated in the heatmap.



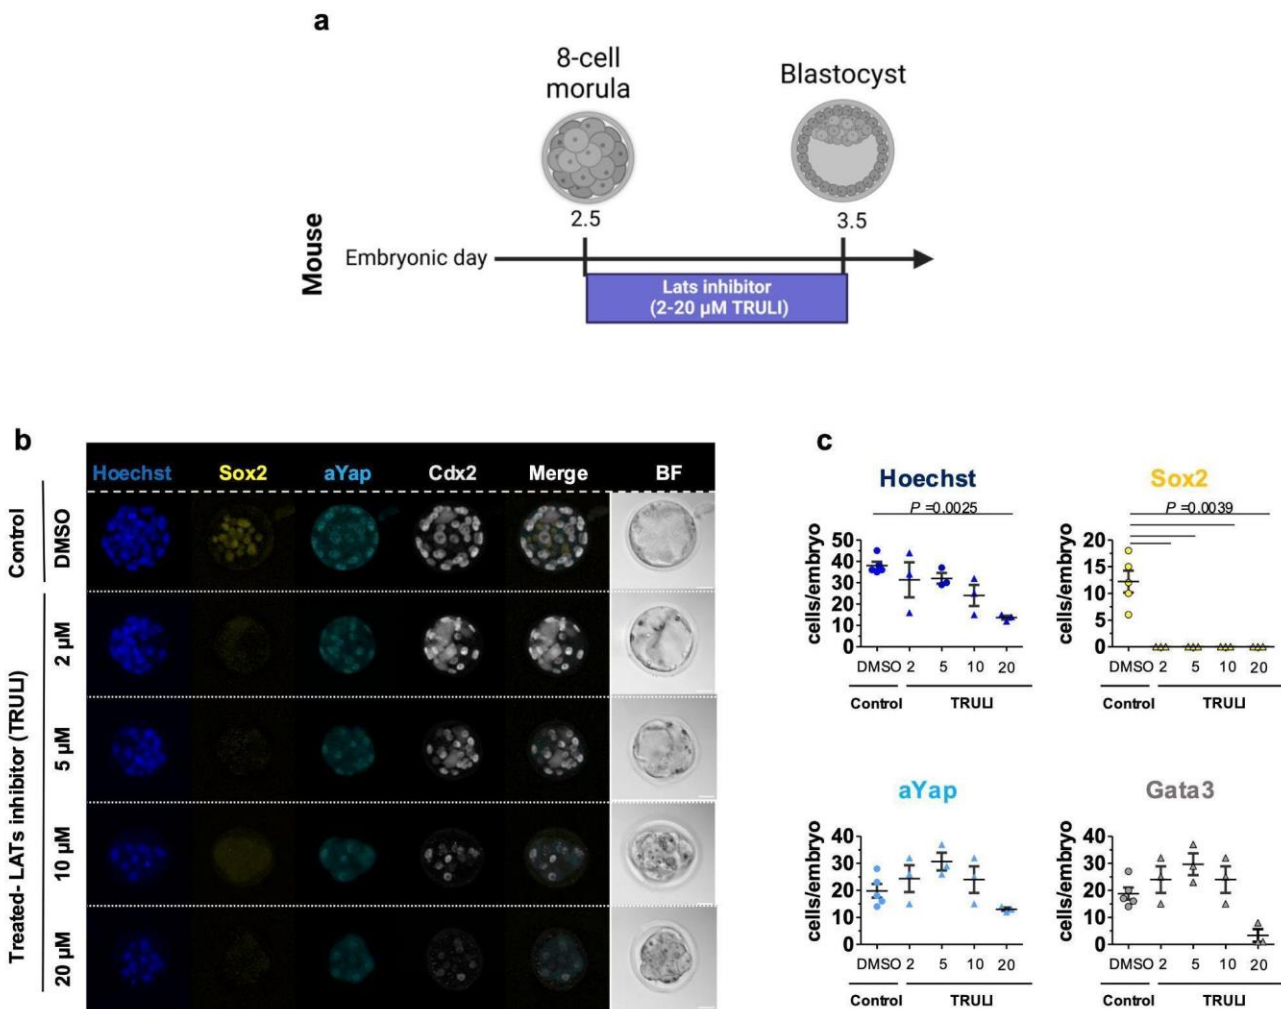

**Supplementary Fig. 5 Dose-response of LATs inhibitor in mouse embryos.** **a**, Schematic of TRULI treatments in mouse embryos. **b**, Representative immunofluorescence images of Sox2 (yellow), Cdx2 (gray), aYAP (cyan) and Hoechst nuclear staining (blue) in control (DMSO) and LATs inhibitor-treated mouse embryos with different concentrations of TRULI inhibitor (2-20  $\mu$ M) from 8 cell E2.25 to blastocyst E3.5 ( $n = 5$  for control and  $n = 3$  for each TRULI dose). **c**, Scatter plot showing the number of cells per embryo for the indicated markers, P values stated in each figure (Kruskal-Wallis test). Schematic created in BioRender.com. Scale bars: 20  $\mu$ m.

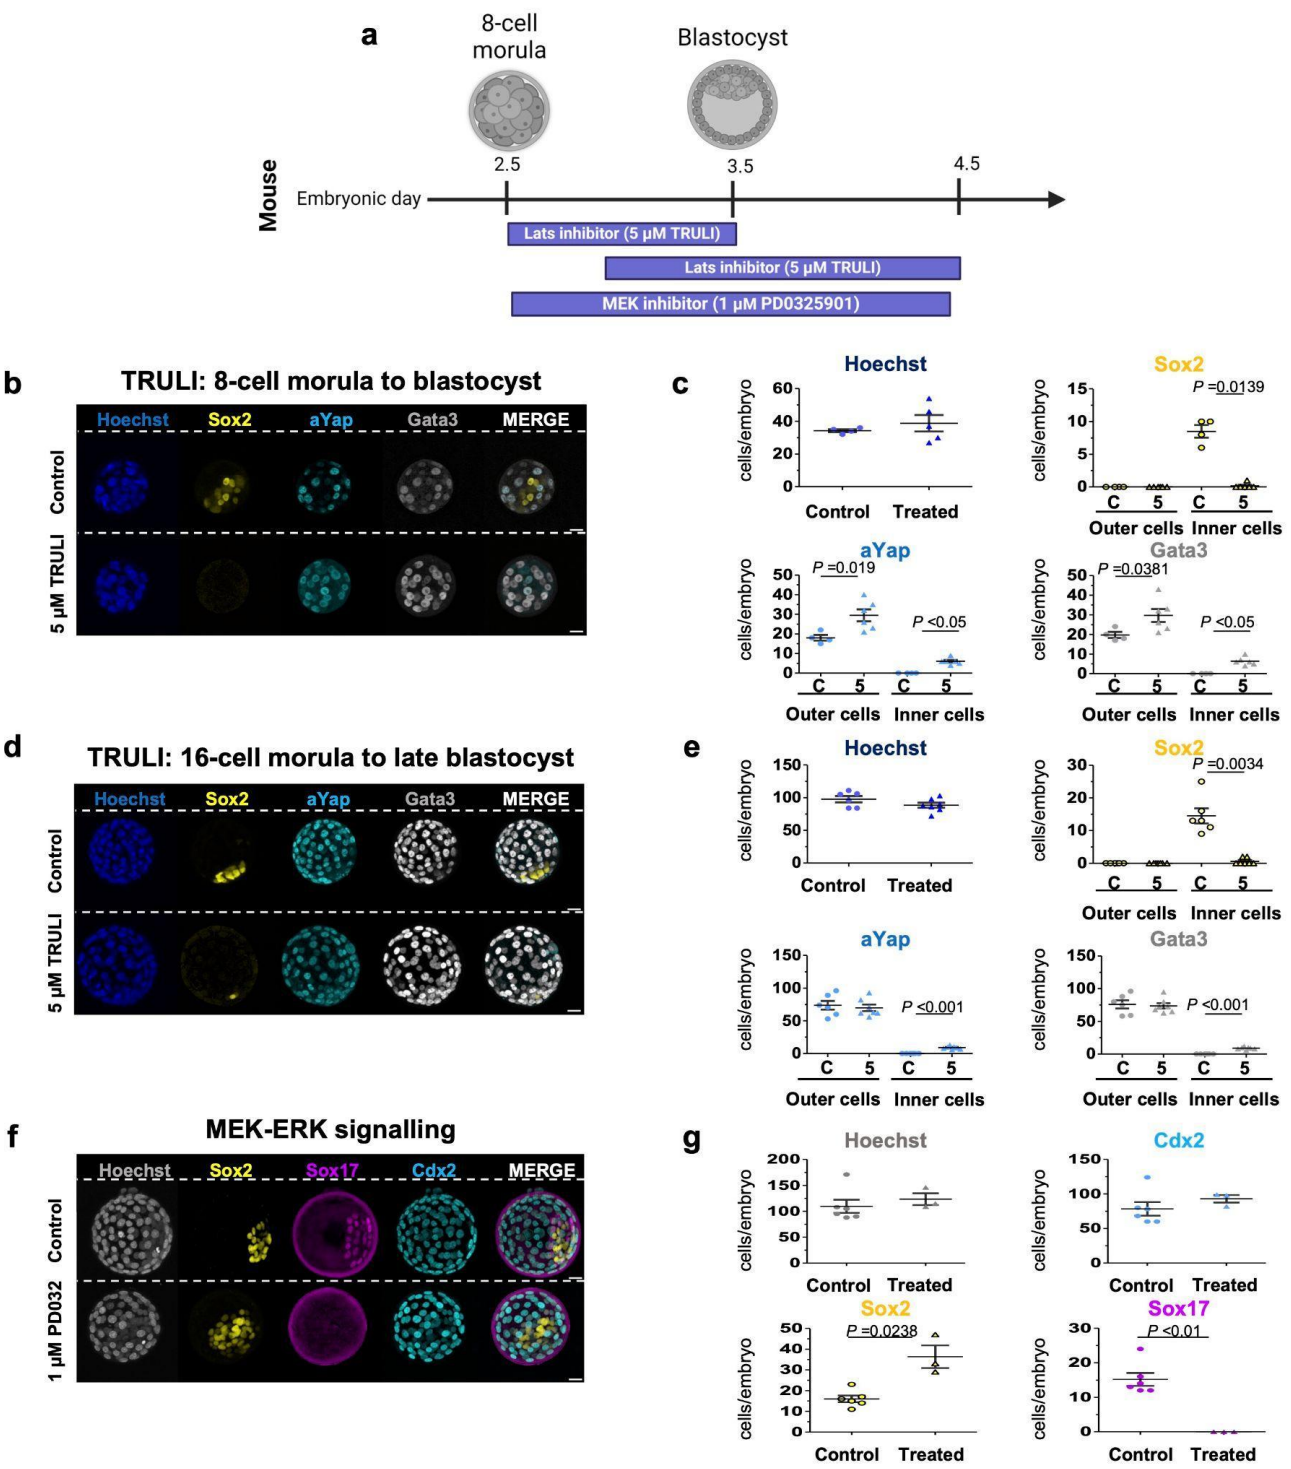

78 **Supplementary Fig. 6 Hippo and MEK-ERK signalling pathways in mouse embryos.** **a**, Schematic of the treatment  
79 protocol for individual small molecules used with mouse embryos. **b**, Representative immunofluorescence image of Sox2  
80 (yellow), aYAP (cyan), Gata3 (gray) and Hoechst nuclear staining (blue) in control (DMSO) and LATS inhibitor (5  $\mu$ M of  
81 TRULI) treated mouse embryos from 8-cell compacted morula to mid-blastocyst. **c**, Scatter plot showing the total number of  
82 cells per embryo (Hoechst stained) and the number of cells per embryo for the indicated markers in control (n = 4) and TRULI  
83 (n = 5) treated embryos. P values stated in each figure (two-tailed Mann-Whitney test). **d**, Representative immunofluorescence

84 image of Sox2 (yellow), aYAP (cyan), Gata3 (gray) and Hoechst nuclear staining (blue) in control (DMSO) and LATS  
85 inhibited (5  $\mu$ M of TRULI) treated mouse embryos from 16-cell compacted morula to late blastocyst. **e**, Scatter plot showing  
86 the total number of cells per embryo (Hoechst stained) and the number of cells per embryo for the indicated markers in control  
87 (n = 6) and TRULI (n = 7) treated embryos, P values stated in each figure. **f**, Representative immunofluorescence image of  
88 Sox2 (yellow), Sox17 (magenta), Cdx2 (cyan) and Hoechst nuclear staining (gray) in control (DMSO) and MEK-ERK  
89 inhibitor (1  $\mu$ M of PD0325901) mouse embryos. **g**, Scatter plot showing the total number of cells per embryo (Hoechst stained)  
90 and the number of cells per embryo for the indicated markers in control (n = 6) and PD0325901 (n = 3) treated embryos. **P**  
91 values stated in each figure (two-tailed Mann–Whitney test for a two-group comparison). Schematic created in  
92 BioRender.com. Scatter plots with mean  $\pm$  s.e.m. Scale bars: 20  $\mu$ m.

93

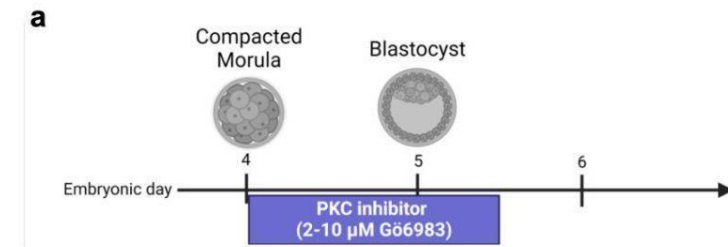

### Guinea pig

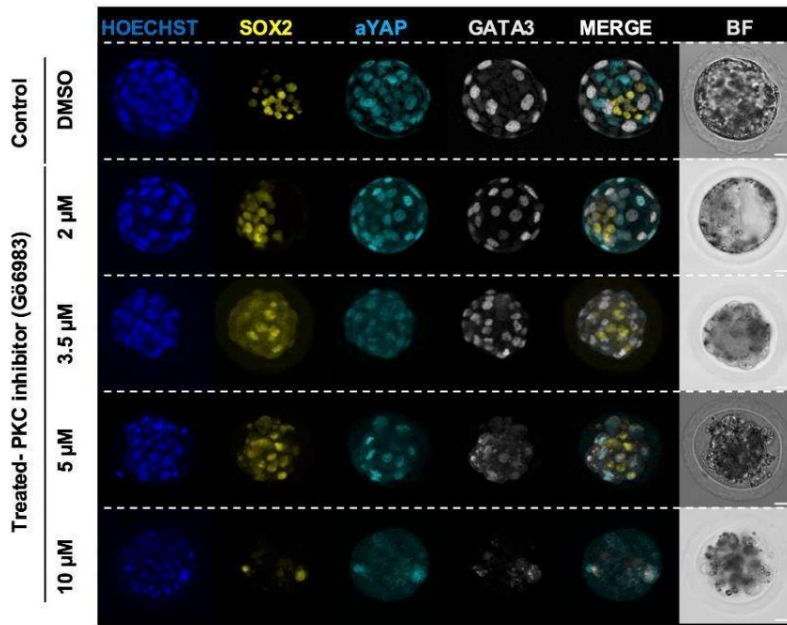

### b

| Medium             | N  | Number (%) of arrested embryos | Number (%) of morula | Number (%) of blastocyst |
|--------------------|----|--------------------------------|----------------------|--------------------------|
| DMSO               | 12 | 1 (8)                          | 2 (17)               | 9 (75)                   |
| 2 $\mu$ M Gö6983   | 3  | 0 (0)                          | 1 (33)               | 2 (67)                   |
| 3.5 $\mu$ M Gö6983 | 6  | 0 (0)                          | 6 (100)              | 0 (0)                    |
| 5 $\mu$ M Gö6983   | 3  | 0 (0)                          | 3 (100)              | 0 (0)                    |
| 10 $\mu$ M Gö6983  | 4  | 3 (75)                         | 0 (0)                | 1 (25)                   |

### d

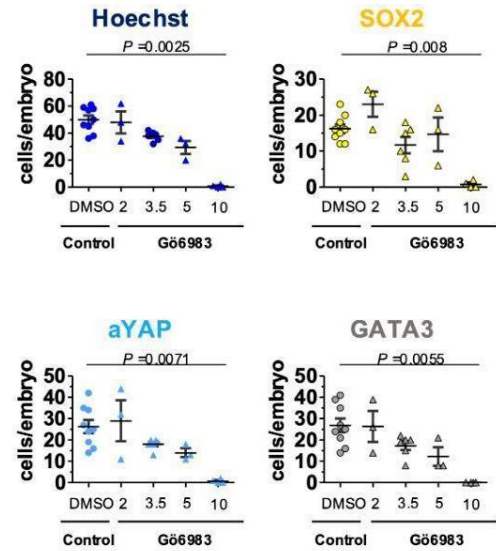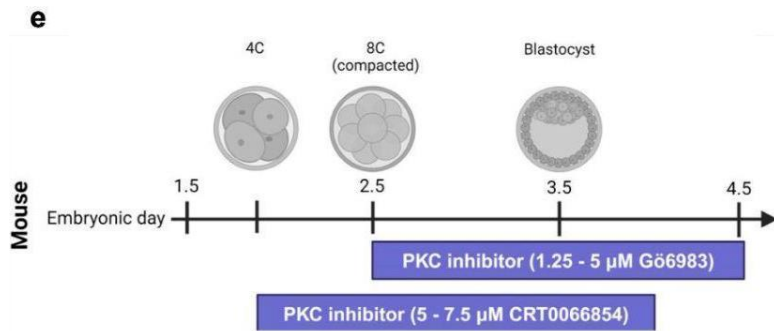

### f

| Medium                | N | Number (%) of arrested embryos | Number (%) of morula | Number (%) of blastocyst |
|-----------------------|---|--------------------------------|----------------------|--------------------------|
| DMSO                  | 8 | 0 (0)                          | 2 (25)               | 6 (75)                   |
| 1.25 $\mu$ M Gö6983   | 5 | 0 (0)                          | 2 (37)               | 3 (63)                   |
| 2.5 $\mu$ M Gö6983    | 7 | 0 (0)                          | 2 (29)               | 5 (71)                   |
| 3.75 $\mu$ M Gö6983   | 5 | 0 (0)                          | 5 (100)              | 0 (0)                    |
| 5 $\mu$ M Gö6983      | 5 | 5 (100)                        | 0 (0)                | 0 (0)                    |
| DMSO                  | 3 | 0 (0)                          | 0 (0)                | 3 (100)                  |
| 5 $\mu$ M CRT006854   | 3 | 0 (0)                          | 1 (33)               | 2 (67)                   |
| 7.5 $\mu$ M CRT006854 | 4 | 1 (25)                         | 3 (75)               | 0 (0)                    |

### g

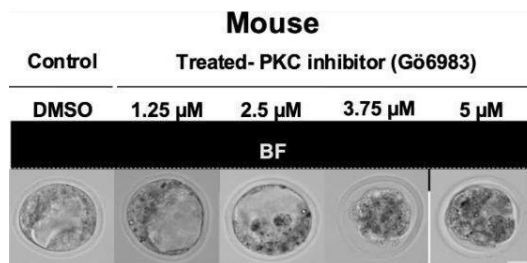

### h

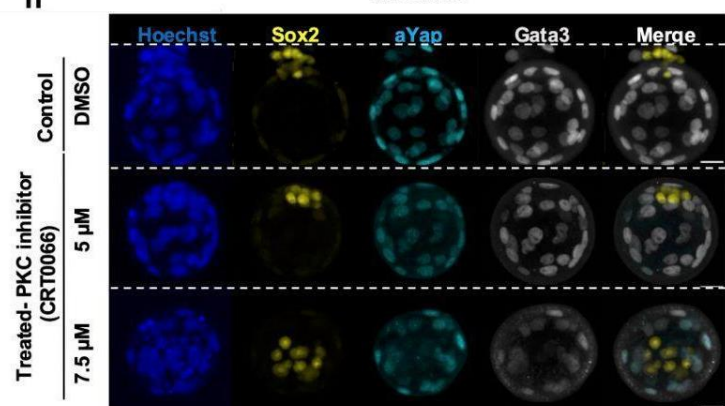

95 **Supplementary Fig. 7 Dose-response of PKC inhibitor treatment in guinea pig and mouse embryos.** **a**, Schematic of  
96 dose-response of PKC inhibitor (Gö6983) in guinea pigs. **b**, The percentage of guinea pig embryos either developing to form  
97 a blastocyst or arrested morula in control and Gö6983 treated embryos. **c**, Representative immunofluorescence image of SOX2  
98 (yellow), aYAP (cyan), GATA3 (gray) and Hoechst nuclear staining (blue) in control (DMSO) and PKC inhibitor (Gö6983)  
99 treated guinea pig embryos from 16-cell compacted morula to mid-blastocyst. **d**, Scatter plot showing the total number of  
100 cells per embryo (Hoechst stained) and the number of cells per embryo for the indicated markers in control (n = 12) and  
101 Gö6983 treated embryos at 2 µM (n = 3), 3.5 µM (n = 6), 5 µM (n = 3) and 10 µM (n = 4). **e**, Schematic of dose-response of  
102 PKC inhibitors (Gö6983 and CRT0066854) in mice. **f**, The percentage of guinea pig embryos that developed to blastocyst or  
103 arrested at the morula stage in control and PKC inhibitors-treated embryos. **g**, Bright-field representative images of mouse  
104 embryos at E3.5 for control (n = 8) and Gö6983 treated at 1.25 µM (n = 5), 2.5 µM (n = 7), 3.75 µM (n = 5) and 5 µM (n =  
105 5) µM. **h**, Representative immunofluorescence image of Sox2 (yellow), aYAP (cyan), Gata3 (gray) and Hoechst nuclear  
106 staining (blue) in control (n = 3) and CRT066854 treated mouse embryos at 5 µM (n = 3) and 7.5 µM (n = 4). P values stated  
107 in each figure (Kruskal-Wallis test with Dunn's post-test). Scatter plots with mean ± s.e.m. Schematic created in  
108 BioRender.com. Scale bars: 20 µm.



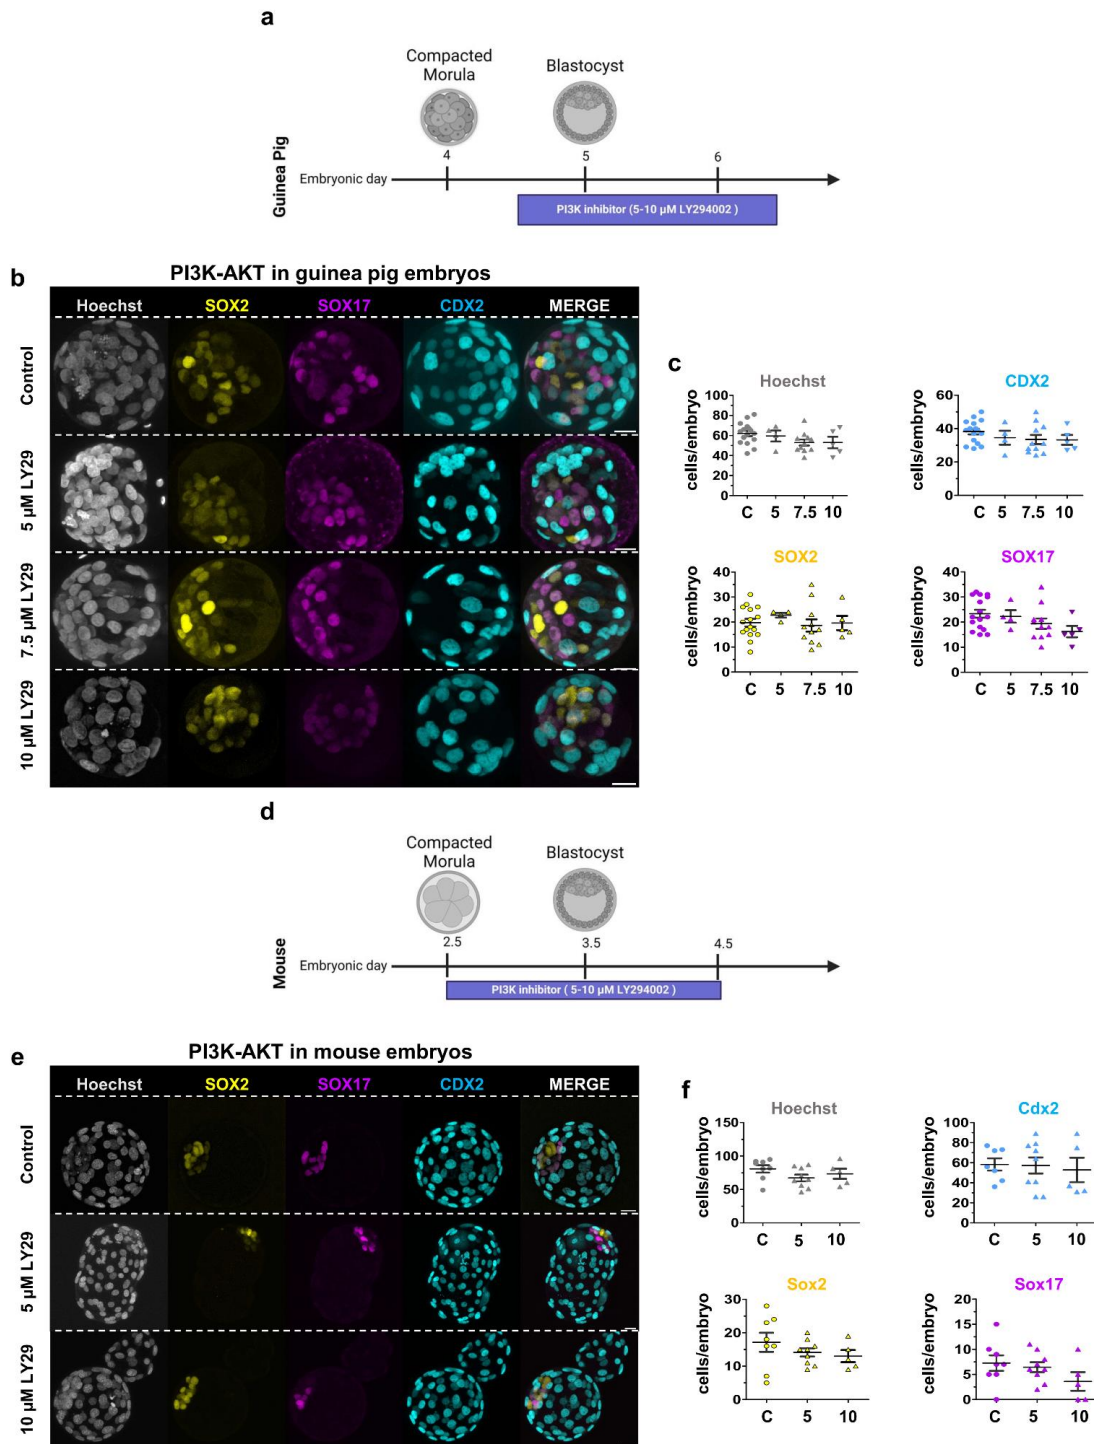

109

110 **Supplementary Fig. 8 Dose-response of PI3K-AKT inhibitor in guinea pig and mouse embryos.** **a**, Schematic of PI3K  
 111 inhibitor (LY294002) treatment in guinea pig embryos. **b**, Representative immunofluorescence image of SOX2 (yellow),  
 112 SOX17 (magenta), CDX2 (cyan) and Hoechst nuclear staining (gray) in control (DMSO) and LY29 treated guinea pig  
 113 embryos for 48 h. **c**, Scatter plot showing the total number of cells per embryo (Hoechst stained) and the number of cells per  
 114 embryo for the indicated markers in control embryos (n = 16) and LY29 treated embryos at 5  $\mu$ M (n = 4), 7.5  $\mu$ M (n = 11)  
 115 and 10  $\mu$ M (n = 5). **d**, Schematic of dose-response of PI3K inhibitor (LY294002) in mice. **e**, Representative  
 116 immunofluorescence image of Sox2 (yellow), Sox17 (magenta), Cdx2 (cyan) and Hoechst nuclear staining (gray) in control  
 117 (DMSO) and LY29 treated mouse embryos. **f**, Scatter plot showing the total number of cells per embryo (Hoechst stained)

118 and the number of cells per embryo for the indicated markers in control (n = 8) and LY29 treated embryos at 5  $\mu$ M (n = 9)  
 119 and 10  $\mu$ M (n = 5). No significant differences (Kruskal-Wallis test). Schematic created in BioRender.com. Scatter plots with  
 120 mean  $\pm$  s.e.m. Scale bars: 20  $\mu$ m.

121

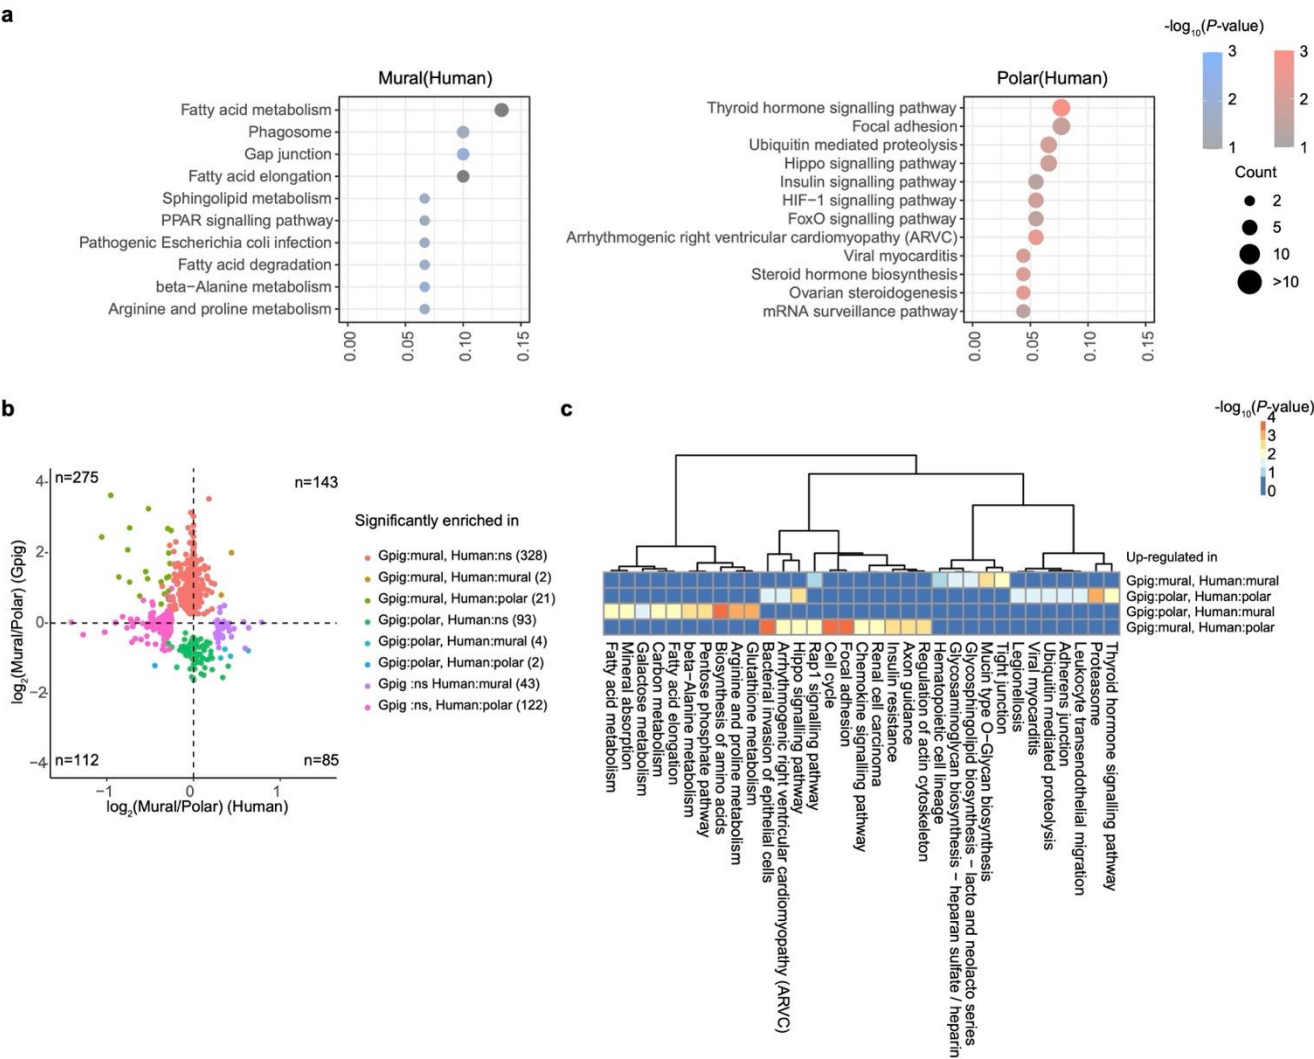

122

123 **Supplementary Fig. 9 Expression of mural and polar DEGs in guinea pig and human mural and polar cells. a,** Dot plot  
 124 illustrating the enriched KEGG pathways for DEGs between mural and polar TE cells from Human (P < 0.05, one-sided,  
 125 permutation test). Colour and size indicate the significance and number of differentially expressed genes in each pathway. **b,**  
 126 Log2 fold change between mural and polar cells in human and guinea pig (x-axis and y-axis, respectively). Colours indicate  
 127 the differential expression status in the guinea pig and human. The number of genes is indicated behind the colour legend. "n"  
 128 in each corner represents the total number of genes in each quadrant. "ns" denotes "not significant." **c,** Heatmap illustrating  
 129 the significance of enriched KEGG pathways for genes associated with differential expression status in guinea pig and human  
 130 mural and polar cells.

131



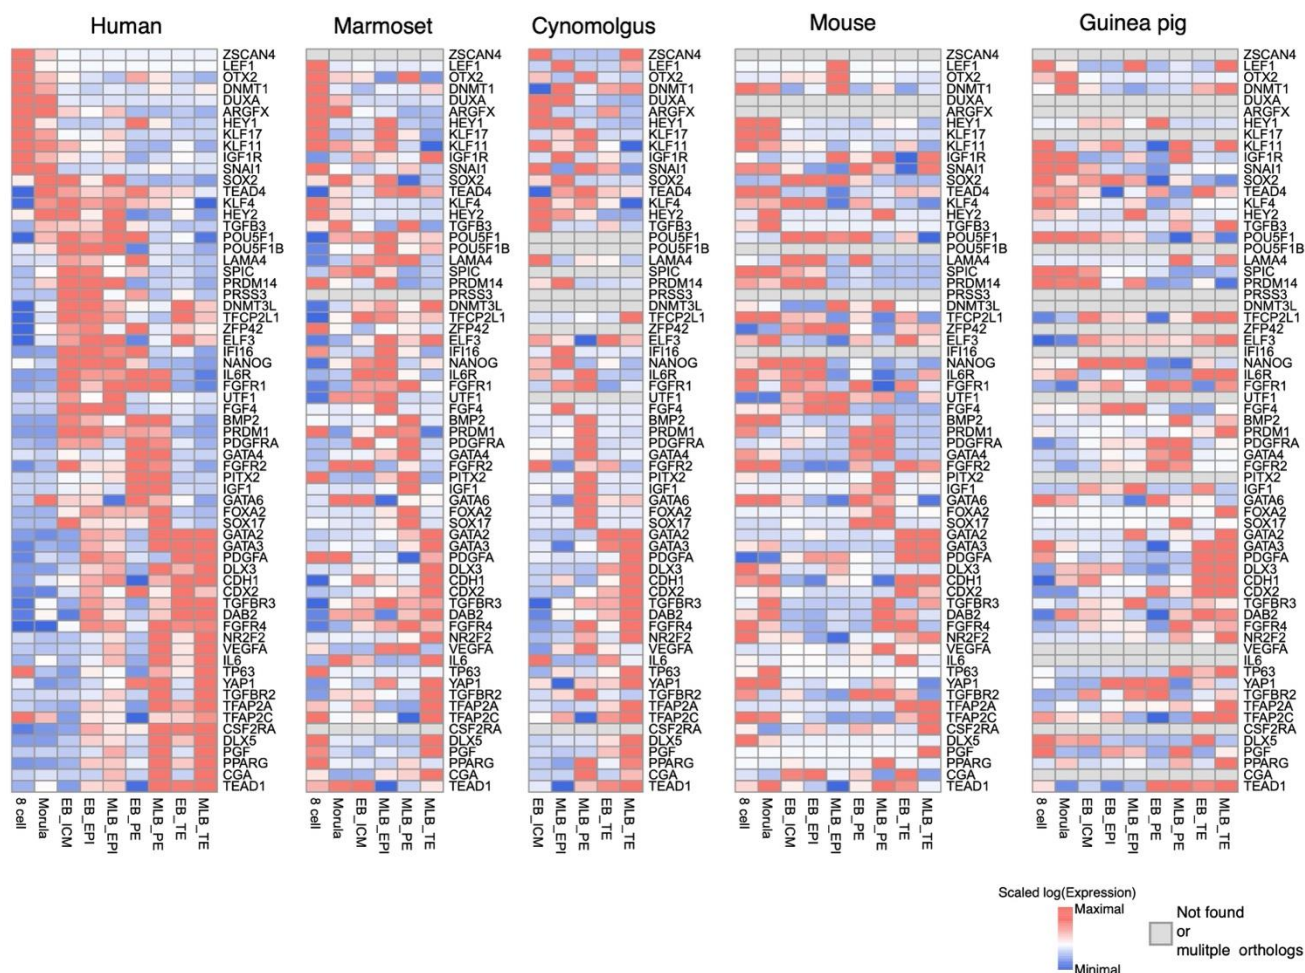

**Supplementary Fig. 10: Heatmap depicting the pseudo-bulk expression of selected genes, categorized by stages and lineages, across human, marmoset, cynomolgus monkey, guinea pig, and mouse species.** Gene selection was adapted from Meistermann et al., 2021 gene module analysis. Genes that could not be detected or with multiple orthologs in the corresponding species are coloured as gray. Preimplantation embryo data was leveraged from Petropoulos et al., 2016 (human), Nakamura et al., 2016 (cynomolgus monkey), Boroviak et al., 2018 (marmoset), Bergmann et al., 2022 (marmoset), Deng et al., 2014 (mouse), Nowotschin et al., 2019 (mouse), guinea pig data generated in this study.

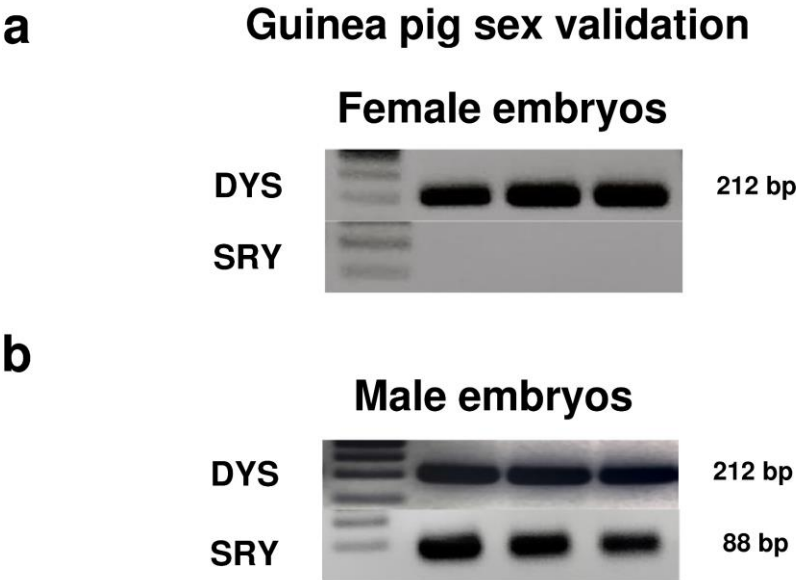

146 **Supplementary Fig. 11: Guinea Pig Blastocysts Sex Validation.** **a** and **b** Representative image of agarose gel following  
147 PCR of DYS and SRY genes for sex determination of three female (E1, E2 and E3) and three male (E4, E5 and E6) embryos  
148 used for H3Kme27 analysis. Amplicon of DYS is 212 bp and of SRY 88 bp.



168  
169  
170  
171  
172

(Number of cells per embryo)

173

| Sox2  |                    |       |                    |
|-------|--------------------|-------|--------------------|
| Outer |                    | Inner |                    |
| DMSO  | 5 $\mu$ M<br>TRULI | DMSO  | 5 $\mu$ M<br>TRULI |
| 0     | 0                  | 10    | 0                  |
| 0     | 0                  | 6     | 0                  |
| 0     | 0                  | 8     | 0                  |
| 0     | 0                  | 10    | 0                  |
|       | 0                  |       | 1                  |
|       | 0                  |       | 0                  |

174  
175

177 **From 16C to Blastocyst E4.5**  
178 (Number of cells per embryo)  
179

180181182182

183     **Supplementary Figure 6g**

184                    **MAPK signalling inhibition (PD0325901) with optimal dose**

185                                    (Number of cells per embryo)

| Hoechst  |               | Cdx2     |               |
|----------|---------------|----------|---------------|
| DMS<br>O | 1 µM<br>PD032 | DMS<br>O | 1 µM<br>PD032 |
| 171      | 146           | 124      | 99            |
| 105      | 109           | 78       | 98            |
| 88       | 115           | 60       | 82            |
| 90       |               | 60       |               |
| 108      |               | 80       |               |
| 95       |               | 68       |               |

186

| Sox2     |               | Sox17    |               |
|----------|---------------|----------|---------------|
| DMS<br>O | 1 µM<br>PD032 | DMS<br>O | 1 µM<br>PD032 |
| 23       | 47            | 24       | 0             |
| 11       | 29            | 16       | 0             |
| 16       | 33            | 12       | 0             |
| 17       |               | 13       |               |
| 14       |               | 14       |               |
| 15       |               | 12       |               |

187

188

189     **Supplementary Figure 7b**

| <b>Medium</b>                       | <b>N</b> | <b>Number (%) of<br/>arrested embryos</b> | <b>Number (%) of<br/>morula</b> | <b>Number (%) of<br/>blastocyst</b> |
|-------------------------------------|----------|-------------------------------------------|---------------------------------|-------------------------------------|
| <b>DMSO</b>                         | 12       | 1 (8)                                     | 2 (17)                          | 9 (75)                              |
| <b>2 <math>\mu</math>M Gö6983</b>   | 3        | 0 (0)                                     | 1 (33)                          | 2 (67)                              |
| <b>3.5 <math>\mu</math>M Gö6983</b> | 6        | 0 (0)                                     | 6 (100)                         | 0 (0)                               |
| <b>5 <math>\mu</math>M Gö6983</b>   | 3        | 0 (0)                                     | 3 (100)                         | 0 (0)                               |
| <b>10 <math>\mu</math>M Gö6983</b>  | 4        | 3 (75)                                    | 0 (0)                           | 1 (25)                              |

190

191



192     **Supplementary Figure 7d**

193                             **Guinea pig Dose-response of PKC inhibitor (Gö6983)**  
194                             (Number of cells per embryo)

| Hoechst |      |        |      |       | SOX2  |      |        |      |       |
|---------|------|--------|------|-------|-------|------|--------|------|-------|
| DMS O   | 2 µM | 3.5 µM | 5 µM | 10 µM | DMS O | 2 µM | 3.5 µM | 5 µM | 10 µM |
| 58      | 62   | 35     | 20   | 2     | 16    | 26   | 3      | 6    | 2     |
| 57      | 48   | 39     | 32   | 0     | 12    | 27   | 8      | 16   | 0     |
| 59      | 34   | 40     | 36   | 1     | 16    | 16   | 15     | 22   | 1     |
| 50      |      | 38     |      | 0     | 18    |      | 16     |      | 0     |
| 45      |      | 42     |      |       | 23    |      | 18     |      |       |
| 36      |      | 32     |      |       | 12    |      | 10     |      |       |
| 46      |      |        |      |       | 14    |      |        |      |       |
| 38      |      |        |      |       | 15    |      |        |      |       |
| 61      |      |        |      |       | 20    |      |        |      |       |

| aYAP  |      |        |      |       | GATA3 |      |        |      |       |
|-------|------|--------|------|-------|-------|------|--------|------|-------|
| DMS O | 2 µM | 3.5 µM | 5 µM | 10 µM | DMS O | 2 µM | 3.5 µM | 5 µM | 10 µM |
| 25    | 32   | 18     | 13   | 2     | 25    | 26   | 22     | 8    | 0     |
| 42    | 44   | 20     | 18   | 1     | 39    | 39   | 20     | 21   | 0     |
| 35    | 11   | 13     | 11   | 0     | 35    | 14   | 8      | 8    | 0     |
| 27    |      | 19     |      | 0     | 27    |      | 19     |      | 0     |
| 19    |      | 18     |      |       | 21    |      | 20     |      |       |
| 14    |      | 20     |      |       | 14    |      | 15     |      |       |
| 24    |      |        |      |       | 24    |      |        |      |       |
| 16    |      |        |      |       | 16    |      |        |      |       |
| 34    |      |        |      |       | 41    |      |        |      |       |

196

197

| <b>Medium</b>         | <b>N</b> | <b>Number (%) of<br/>arrested embryos</b> | <b>Number (%) of<br/>morula</b> | <b>Number (%) of<br/>blastocyst</b> |
|-----------------------|----------|-------------------------------------------|---------------------------------|-------------------------------------|
| <b>DMSO</b>           | 8        | 0 (0)                                     | 2 (25)                          | 6 (75)                              |
| <b>1.25 µM Gö6983</b> | 5        | 0 (0)                                     | 2 (37)                          | 3 (63)                              |
| <b>2.5 µM Gö6983</b>  | 7        | 0 (0)                                     | 2 (29)                          | 5 (71)                              |
| <b>3.75 µM Gö6983</b> | 5        | 0 (0)                                     | 5 (100)                         | 0 (0)                               |
| <b>5 µM Gö6983</b>    | 5        | 5 (100)                                   | 0 (0)                           | 0 (0)                               |

|                       |   |        |        |         |
|-----------------------|---|--------|--------|---------|
| <b>DMSO</b>           | 3 | 0 (0)  | 0 (0)  | 3 (100) |
| <b>5 µM CRT0066</b>   | 3 | 0 (0)  | 1 (33) | 2 (67)  |
| <b>7.5 µM CRT0066</b> | 4 | 1 (25) | 3 (75) | 0 (0)   |

201 **Supplementary Figure 8c**

202 **Guinea Pig PI3K Dose-response**  
203 **Inhibition (LY294002) for 48h**  
204 (Number of cells per embryo)  
205

| Hoechst |           |             |            |
|---------|-----------|-------------|------------|
| DMSO    | 5 µM LY29 | 7.5 µM LY29 | 10 µM LY29 |
| 81      | 69        | 75          | 68         |
| 78      | 44        | 61          | 44         |
| 72      | 65        | 45          | 38         |
| 42      | 60        | 46          | 64         |
| 66      |           | 48          | 51         |
| 64      |           | 38          |            |
| 65      |           | 46          |            |
| 58      |           | 57          |            |
| 62      |           | 56          |            |
| 61      |           | 58          |            |
| 69      |           | 52          |            |
| 67      |           |             |            |
| 53      |           |             |            |
| 56      |           |             |            |
| 46      |           |             |            |
| 52      |           |             |            |

| CDX2 |           |             |            |
|------|-----------|-------------|------------|
| DMSO | 5 µM LY29 | 7.5 µM LY29 | 10 µM LY29 |
| 40   | 37        | 50          | 32         |
| 43   | 24        | 45          | 28         |
| 50   | 44        | 31          | 27         |
| 29   | 33        | 28          | 36         |
| 39   |           | 28          | 43         |
| 31   |           | 25          |            |
| 39   |           | 41          |            |
| 33   |           | 26          |            |
| 28   |           | 39          |            |
| 40   |           | 24          |            |
| 37   |           | 31          |            |
| 47   |           |             |            |
| 29   |           |             |            |
| 45   |           |             |            |
| 37   |           |             |            |
| 44   |           |             |            |

206

| SOX2 |           |             |            |
|------|-----------|-------------|------------|
| DMSO | 5 µM LY29 | 7.5 µM LY29 | 10 µM LY29 |
| 31   | 24        | 35          | 30         |
| 27   | 20        | 31          | 16         |
| 18   | 24        | 12          | 17         |
| 22   | 23        | 19          | 14         |
| 26   |           | 11          | 21         |
| 26   |           | 14          |            |
| 8    |           | 9           |            |
| 15   |           | 18          |            |
| 20   |           | 16          |            |
| 25   |           | 23          |            |
| 17   |           | 17          |            |
| 12   |           |             |            |
| 17   |           |             |            |
| 21   |           |             |            |
| 16   |           |             |            |
| 15   |           |             |            |

| SOX17 |           |             |            |
|-------|-----------|-------------|------------|
| DMSO  | 5 µM LY29 | 7.5 µM LY29 | 10 µM LY29 |
| 31    | 29        | 34          | 24         |
| 32    | 17        | 28          | 15         |
| 20    | 21        | 14          | 15         |
| 21    | 22        | 21          | 10         |
| 24    |           | 15          | 17         |
| 31    |           | 14          |            |
| 22    |           | 10          |            |
| 15    |           | 18          |            |
| 17    |           | 18          |            |
| 30    |           | 21          |            |
| 31    |           | 20          |            |
| 28    |           |             |            |
| 18    |           |             |            |
| 22    |           |             |            |
| 16    |           |             |            |
| 15    |           |             |            |

207 **Supplementary Figure 8f**  
208

209  
210  
211  
212

**Mouse PI3K Dose-response**  
**Inhibition (LY294002) for 48h**  
(Number of cells per embryo)

| Hoechst |                |                 |
|---------|----------------|-----------------|
| DMSO    | 5 $\mu$ M LY29 | 10 $\mu$ M LY29 |
| 89      | 70             | 76              |
| 82      | 87             | 60              |
| 91      | 85             | 54              |
| 92      | 51             | 81              |
| 49      | 56             | 96              |
| 67      | 65             |                 |
| 81      | 63             |                 |
| 95      | 46             |                 |
|         | 82             |                 |

| Cdx2 |                |                 |
|------|----------------|-----------------|
| DMSO | 5 $\mu$ M LY29 | 10 $\mu$ M LY29 |
| 72   | 64             | 37              |
| 73   | 79             | 32              |
| 52   | 72             | 31              |
| 56   | 89             | 75              |
| 42   | 26             | 89              |
| 36   | 41             |                 |
| 77   | 41             |                 |
|      | 26             |                 |
|      | 77             |                 |

213

| Sox2 |                |                 |
|------|----------------|-----------------|
| DMSO | 5 $\mu$ M LY29 | 10 $\mu$ M LY29 |
| 28   | 15             | 12              |
| 16   | 9              | 19              |
| 24   | 13             | 9               |
| 23   | 10             | 10              |
| 5    | 18             | 15              |
| 16   | 15             |                 |
| 18   | 20             |                 |
| 7    | 16             |                 |
|      | 11             |                 |

| Sox17 |                |                 |
|-------|----------------|-----------------|
| DMSO  | 5 $\mu$ M LY29 | 10 $\mu$ M LY29 |
| 15    | 7              | 3               |
| 10    | 8              | 0               |
| 5     | 10             | 0               |
| 7     | 11             | 10              |
| 0     | 5              | 5               |
| 5     | 3              |                 |
| 9     | 2              |                 |
| 7     | 6              |                 |
|       | 6              |                 |

214  
215

**Guinea pig sex validation**

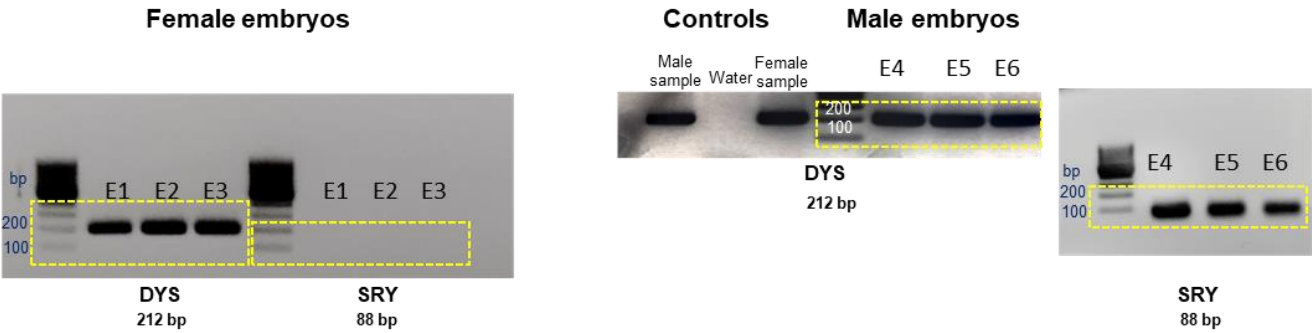

Supplement: MOESM1 [file 41556_2025_1642_MOESM1_ESM.pdf]
